# Supplementary material for: A prototype of high-performance two-electron non-aqueous organic redox flow battery operated at −40 °C
Source: Royal Society of Chemistry journal article supplement (doi:10.1039/d2ta07876g), 2022-01-01
Supplement: d2ta07876g1.pdf [file d2ta07876g1.pdf]

### Supporting information for

A prototype of high-performance two-electron non-aqueous organic redox flow battery operated at -40 °C

Zhiming Liang<sup>a,c\*</sup>, Rahul kant Jha<sup>a,b</sup>, Thilini Malsha Suduwella<sup>a,b</sup>, N. Harsha Attanayake<sup>a,b</sup>, Yangyang Wang<sup>c</sup>, Wei Zhang<sup>c</sup>, Chuntian Cao<sup>d</sup>, Aman Preet Kaur<sup>a,b</sup>, James Landon<sup>e,f</sup>, and Susan A. Odom<sup>a,b</sup>

<sup>a</sup> Department of Chemistry, University of Kentucky, Lexington, KY 40506, USA

<sup>b</sup> Joint Center for Energy Storage Research, Lexington, KY 40506, USA

<sup>c</sup> Department of mechanical Engineering, University of Colorado, Boulder, CO 80309, USA

<sup>d</sup> Computational Science Initiative, Brookhaven National Laboratory, Upton, NY 11973, USA

<sup>e</sup> Center for Applied Energy Research, University of Kentucky, Lexington, KY 40511, USA

<sup>f</sup> Department of Chemical and Materials Engineering, University of Kentucky, Lexington, KY 40506, USA

\* Corresponding author information

leungchiminh@gmail.com

### Figures and Tables

Table S1. Progress of aqueous and non-aqueous redox flow batteries at low temperature.

| Aqueous inorganic RFBs                         |                                                               |                    |                                |              |                                       |                          |       |
|------------------------------------------------|---------------------------------------------------------------|--------------------|--------------------------------|--------------|---------------------------------------|--------------------------|-------|
| catholyte                                      | anolyte                                                       | cycled temperature | active materials concentration | cell voltage | cycled current (mA cm <sup>-2</sup> ) | accessed capacity        | Refs. |
| Zn/Zn <sup>2+</sup>                            | I <sub>3</sub> /I <sup>-</sup>                                | -20 °C             | 3.5 M                          | ~ 1.3 V      | 10 (40 cycles)                        | ~ 130 Ah L <sup>-1</sup> | 1     |
| FeCl <sub>2</sub>                              | MeTsPc                                                        | -30 °C             | 0.05 M                         | ~ 1.3 V      | 3 (50 cycles)                         | ~ 1.5 Ah L <sup>-1</sup> | 2     |
| VO <sup>2+</sup> /VO <sub>2</sub> <sup>+</sup> | H <sub>6</sub> P <sub>2</sub> W <sub>18</sub> O <sub>62</sub> | -20 °C             | 0.5 M                          | ~ 1.1 V      | 160 (800 cycles)                      | ~ 80 Ah L <sup>-1</sup>  | 3     |

  

| Non-aqueous organic RFBs                              |                                                        |                    |                                |                |                  |                                                                      |           |
|-------------------------------------------------------|--------------------------------------------------------|--------------------|--------------------------------|----------------|------------------|----------------------------------------------------------------------|-----------|
| catholyte                                             | anolyte                                                | cycled temperature | active materials concentration | cell voltage   | current          | accessed capacity                                                    | Refs.     |
| H <sub>2</sub> TPP/[H <sub>2</sub> TPP] <sup>2+</sup> | [H <sub>2</sub> TPP] <sup>2+</sup> /H <sub>2</sub> TPP | -40 °C             | 0.3M                           | symmetric cell | 1 (~ 200 cycles) | ~ 1.8 Ah L <sup>-1</sup>                                             | 4         |
| BMEEOEPT                                              | MEEV-TFSI <sub>2</sub>                                 | -40 °C             | 0.1M, 0.25M                    | ~ 1.9 V        | 15 (>100 cycles) | ~ 3.2 Ah L <sup>-1</sup> (0.1M);<br>~ 8.5 Ah L <sup>-1</sup> (0.25M) | This work |

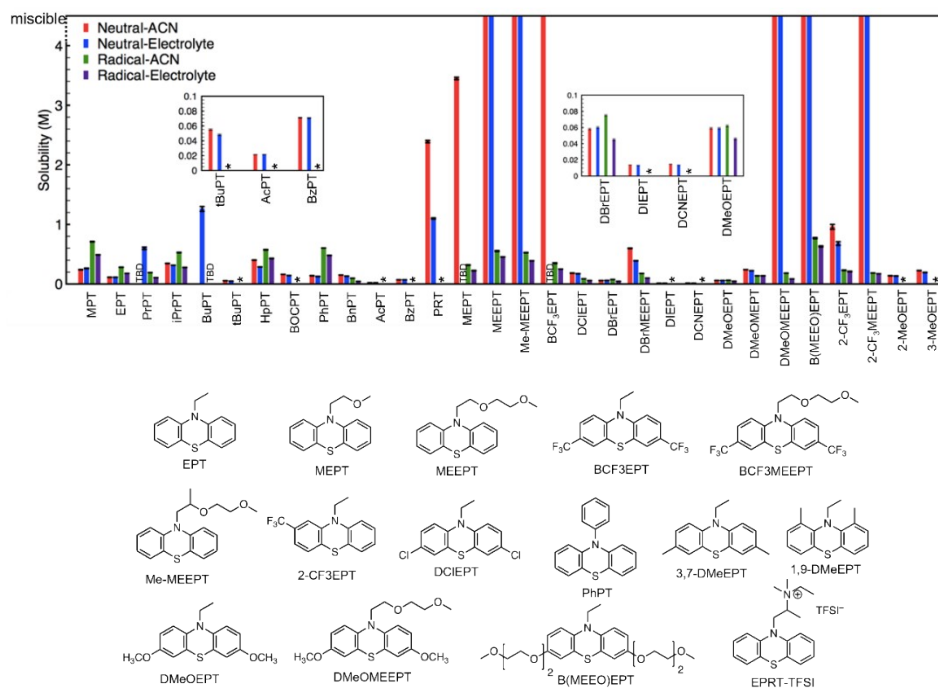

Figure S1. Measured solubility of Phenothiazine derivatives (neutral and radicals) in solvent (ACN) and electrolyte (0.5M TEABF<sub>4</sub>/ACN). This figure was modified based on our previous research.<sup>5</sup> Reprinted with permission. Copyright The Royal Society of Chemistry.

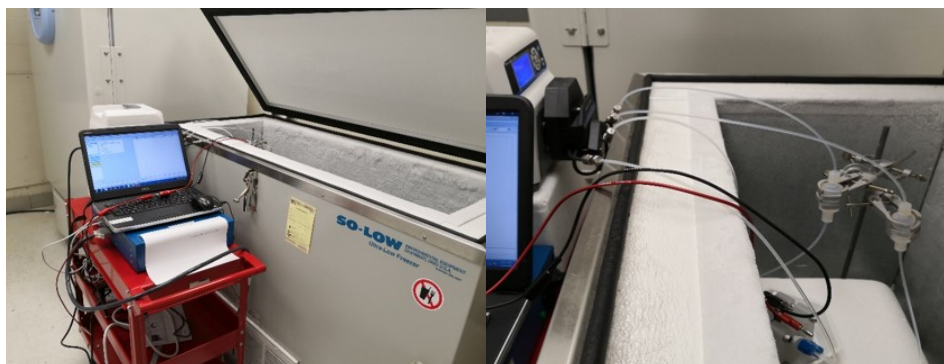

Figure S2. Photographs of the - 40 °C non-aqueous redox flow cell setup.

Table S2. Chemical and electrochemical properties of the commonly used solvents for non-aqueous redox flow battery.<sup>6,7</sup>

|                     | Melting point (°C) | Boiling point (°C) | Viscosity (mPa s <sup>-1</sup> )* | Electrochemical window (V) |
|---------------------|--------------------|--------------------|-----------------------------------|----------------------------|
| Acetonitrile        | -46                | 81.6               | 0.34                              | 6.1                        |
| Dichloromethane     | -96.7              | 39.6               | 0.44                              | N/A                        |
| tetrahydrofuran     | -108.4             | 66                 | 0.46                              | N/A                        |
| Propylene carbonate | -48.8              | 242                | 0.41                              | 6.6                        |
| Dimethoxyethane     | -58                | 85                 | 1.1                               | N/A                        |
| Toluene             | -95                | 111                | 0.55                              | N/A                        |
| Dimethylformamide   | -60                | 153                | 0.92                              | N/A                        |

\* Viscosity was measured at 25 °C.

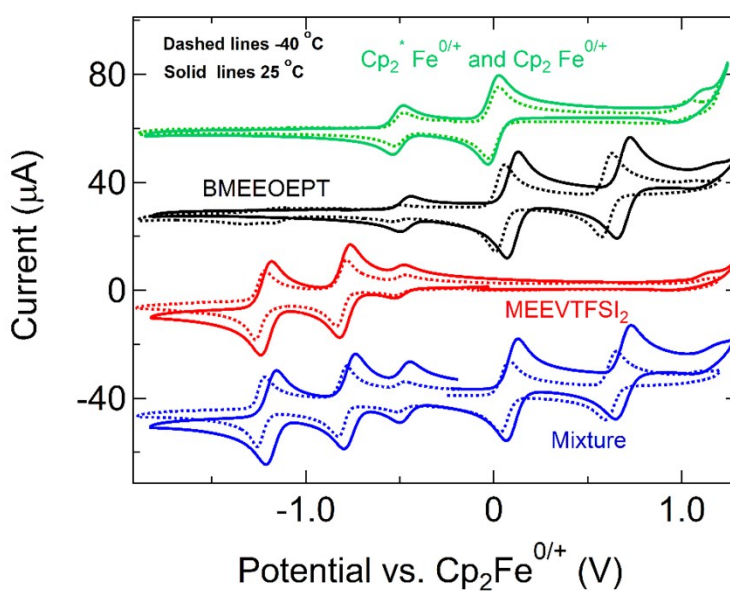

Figure S3. The calibration of the redox potentials using decamethylferrocene and ferrocene (green). In subsequent scans, decamethylferrocene (Cp<sub>2</sub>\*Fe) was used as an internal reference. Cyclic voltammograms full redox potentials at 25 °C (solid line) and -40 °C (dashed line) of 1 mM BMEEOEPT (black), MEEV-TFSI<sub>2</sub> (red), and the combination of BMEEOEPT and MEEV-TFSI<sub>2</sub> (blue) in 0.5 M TEATFSI/ACN, all containing decamethylferrocene as an internal reference. The potential of Cp<sub>2</sub>\*Fe<sup>0/+</sup> vs. Cp<sub>2</sub>Fe<sup>0/+</sup> is -0.509 V (25 °C) and -0.515 V (-40 °C). All scans are calibrated to ferrocene/ferrocenium (Cp<sub>2</sub>Fe<sup>0/+</sup>) at 0 V. The scan rate was 100 mV s<sup>-1</sup>.

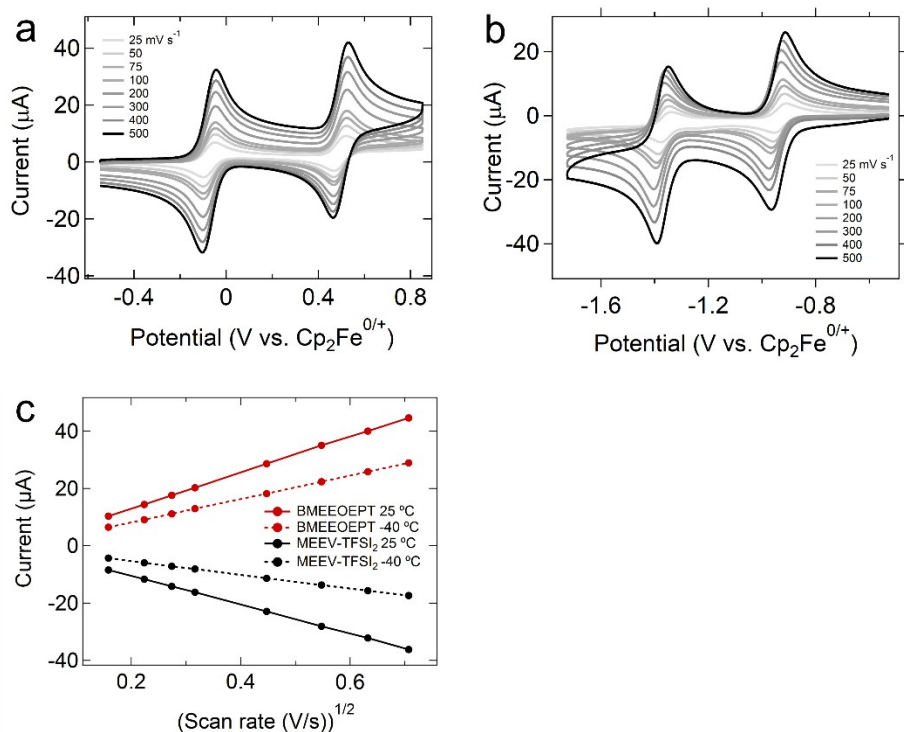

Figure S4. CV of 1 mM BMEEOEPT (a) and MEEV-TFSI<sub>2</sub> (b) in 0.5 M TEATFSI/ACN at -40 °C; c) The corresponding Randles-Sevcik plot of 1 mM BMEEOEPT and MEEV-TFSI<sub>2</sub>. The Scan rates are 25, 50, 75, 100, 200, 300, 400, and 500  $\text{mV s}^{-1}$ .

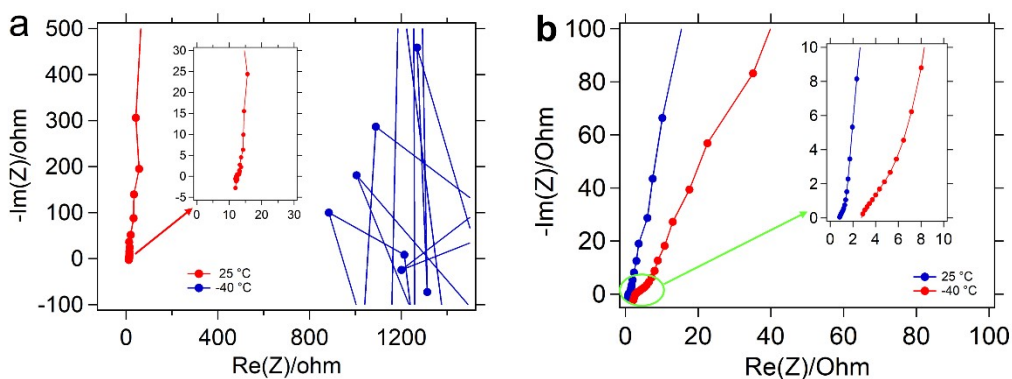

Figure S5. Nyquist plots of 2X FAPQ 375 PP (a) and Daramic 175 separator in 0.5M TEATFSI/ACN at 25 and -40 °C. The area of tested membrane or separator is 2.55  $\text{cm}^2$ . EIS was conducted with circulating electrolytes with an amplitude of 10 mV in a frequency range of 100 kHz to 1Hz (5 steps per decade).

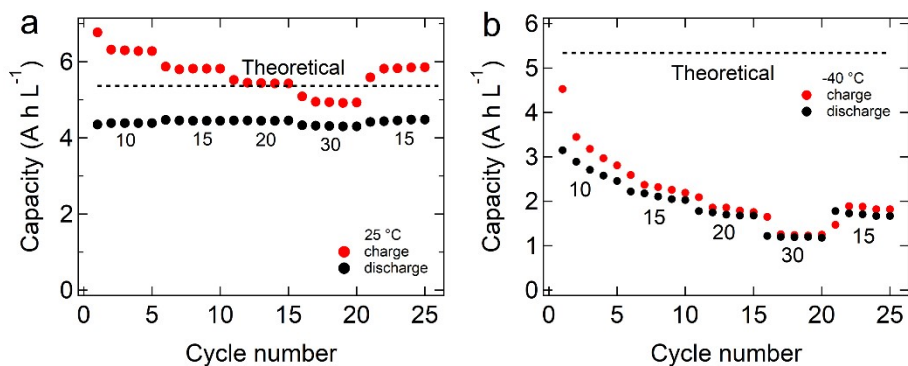

Figure S6. Rate study of the 0.1M premixed cells cycled at 25 (a) and -40 °C (b) with current density of 10, 15, 20, 30, and 15 mA cm<sup>-2</sup>. The theoretical capacity is 5.36 A h L<sup>-1</sup>.

Table S3. Electrochemical data of the 0.1M premixed cells cycled at 25 and -40 °C with current density 10, 15, 20, 30, and 15 mA cm<sup>-2</sup>. Data was calculated by the average of 2<sup>nd</sup>, 3<sup>rd</sup>, and 4<sup>th</sup> cycle at each current density.

| Temperature (°C) | current density (mA cm <sup>-2</sup> ) | charge capacity (A h L <sup>-1</sup> ) | discharge capacity (A h L <sup>-1</sup> ) | CE (%) | EE (%) | VE (%) |
|------------------|----------------------------------------|----------------------------------------|-------------------------------------------|--------|--------|--------|
| -40              | 10                                     | 3.2                                    | 2.73                                      | 85.3   | 67.2   | 78.8   |
|                  | 15                                     | 2.32                                   | 2.11                                      | 91.1   | 65.1   | 71.5   |
|                  | 20                                     | 1.84                                   | 1.71                                      | 93.1   | 59.1   | 63.5   |
|                  | 30                                     | 1.24                                   | 1.2                                       | 96.3   | 51.8   | 53.8   |
|                  | 15                                     | 1.86                                   | 1.7                                       | 91.5   | 64.5   | 70.5   |
| 25               | 10                                     | 6.3                                    | 4.39                                      | 69.6   | 58.3   | 83.8   |
|                  | 15                                     | 5.81                                   | 4.45                                      | 76.7   | 62.9   | 82     |
|                  | 20                                     | 5.44                                   | 4.45                                      | 81.9   | 64.9   | 79.2   |
|                  | 30                                     | 4.94                                   | 4.31                                      | 87.4   | 63.6   | 72.8   |
|                  | 15                                     | 5.83                                   | 4.46                                      | 76.4   | 62.9   | 82.3   |

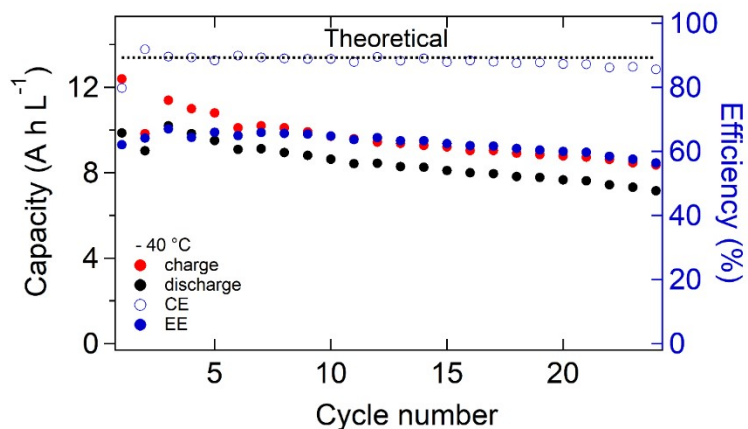

Figure S7. -40 °C 0.25 M premixed BMEEOEPT and MEEV-TFSI<sub>2</sub> cell with Daramic 175 separator. The current rate is 15 mA cm<sup>-2</sup>. The theoretical capacity is 13.4 A h L<sup>-1</sup>.

Table S4. Fitting EIS data for the 25 and -40 °C cells. R<sub>1</sub> stands for ohmic resistance. R<sub>2</sub> stands for charge transfer resistance.

|                    | before cycling<br>25 °C | after 100 cycles<br>25 °C | before cycling<br>- 40 °C | after 100 cycles<br>- 40 °C | move to<br>25 °C |
|--------------------|-------------------------|---------------------------|---------------------------|-----------------------------|------------------|
| R <sub>1</sub> (Ω) | 0.872                   | 0.889                     | 2.11                      | 2.792                       | 1.626            |
| R <sub>2</sub> (Ω) | 2.736                   | 0.136                     | 6.467                     | 0.9616                      | 0.247            |

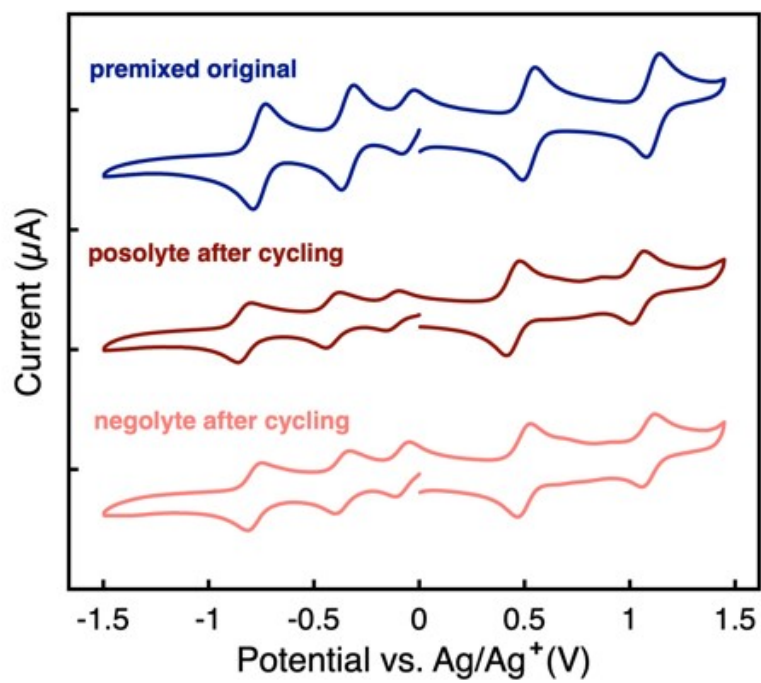

Figure S8. CV of 0.1M premixed -40 °C cell before and after cycling vs Ag/Ag<sup>+</sup>. Decamethylferrocene was used as the internal reference. The scan rate is 100 mV s<sup>-1</sup>.

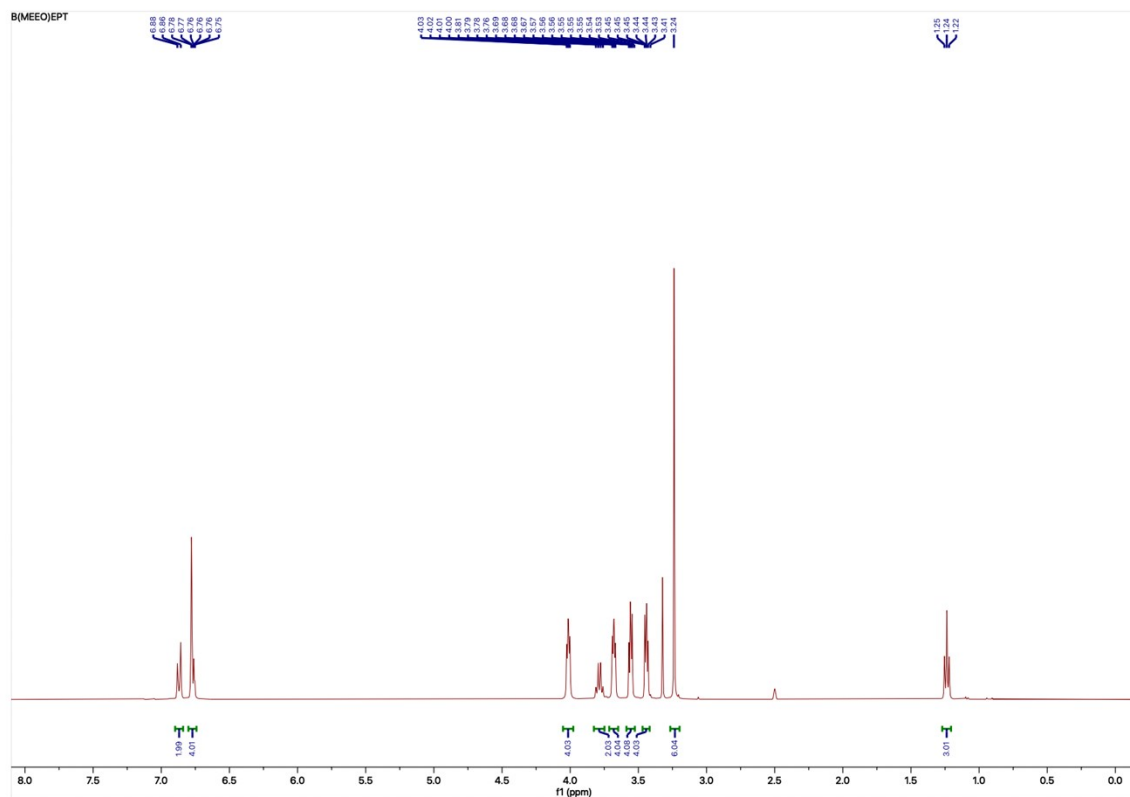

Figure S9. Pristine N-ethyl-3,7-bis(2-(2-methoxyethoxy)ethoxy)phenothiazine (BMEEOEPT).  $^1\text{H}$  NMR (DMSO- $d_6$ , 400 MHz, ppm)  $\delta$  6.88 (d,  $J$  = 9.7 Hz, 2H), 6.79 – 6.75 (m, 4H), 4.04 – 3.98 (m, 4H), 3.79 (q,  $J$  = 6.9 Hz, 2H), 3.71 – 3.65 (m, 4H), 3.58 – 3.52 (m, 4H), 3.47 – 3.42 (m, 4H), 3.24 (s, 6H), 1.24 (t,  $J$  = 6.8 Hz, 3H).<sup>8</sup>



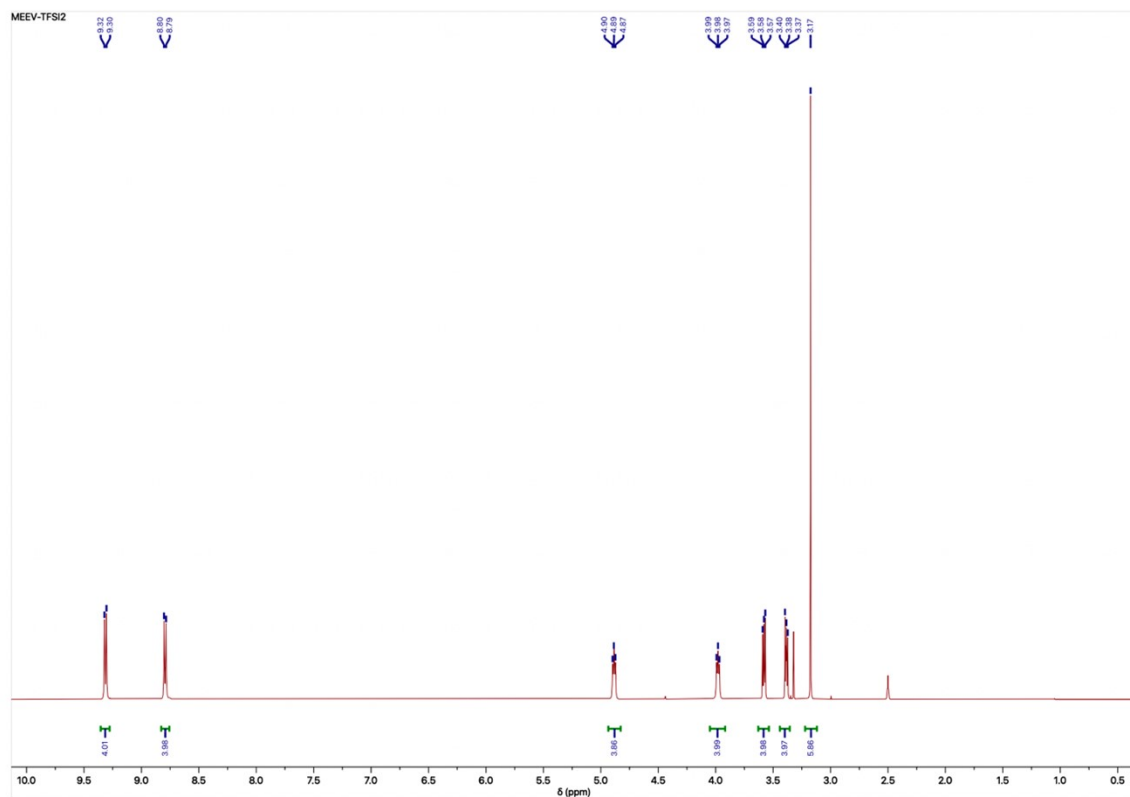

Figure S10. Pristine Bis((2-(2-methoxyethoxy)ethyl)viologen bis(trifluoromethanesulfonyl)imide (MEEV-(TFSI)<sub>2</sub>). <sup>1</sup>H NMR (DMSO-d<sub>6</sub>, 400 MHz, ppm) δ 9.3 (d, J = 6.6 Hz, 4H), 8.78 (d, J = 6.6 Hz, 4H), 4.88 (t, J = 5.0 Hz, 4H), 4.00 (t, J = 5Hz, 4H), 3.57 (t, J = 4.4 Hz, 4H), 3.38 (t, J = 4.4 Hz, 4H), 3.17 (s, 6H).<sup>9</sup>

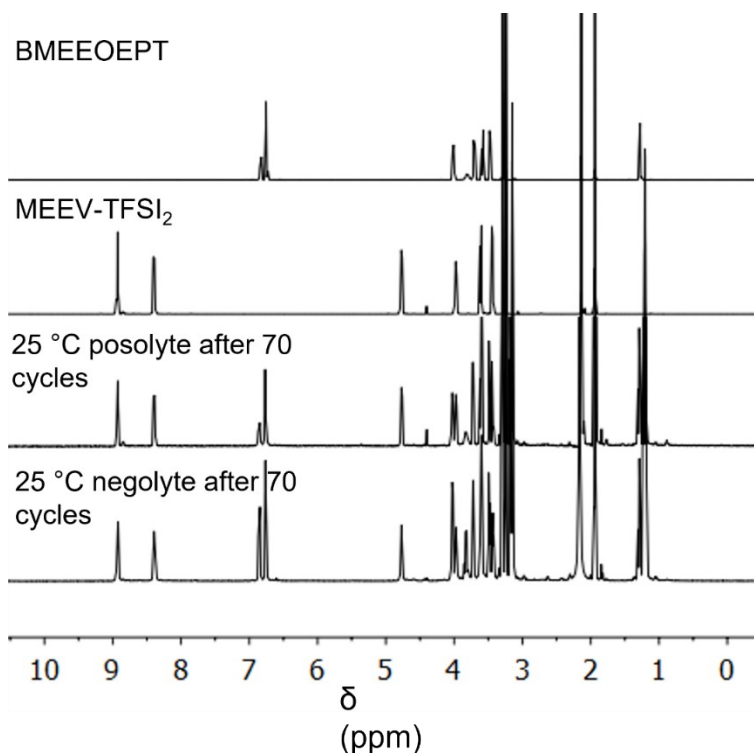

Figure S11.  $^1\text{H}$  NMR spectra of 0.5 M BMEEOEPT and MEEV-TFSI<sub>2</sub> separated cell assembled with 2x FAPQ 375 PP membrane before and after 70 cycles (CD<sub>3</sub>CN, 400 MHz) at 25 °C.

## References

1. B. Li, Z. Nie, M. Vijayakumar, G. Li, J. Liu, V. Sprenkle and W. Wang, *Nat. Commun.*, 2015, **6**, 1-8.
2. Z. Huang, P. Zhang, X. Gao, D. Henkensmeier, S. Passerini and R. Chen, *ACS Appl. Energy Mater.*, 2019, **2**, 3773-3779.
3. F. Ai, Z. Wang, N.-C. Lai, Q. Zou, Z. Liang and Y.-C. Lu, *Nat. Energy*, 2022, **7**, 417-426.
4. T. Ma, Z. Pan, L. Miao, C. Chen, M. Han, Z. Shang and J. Chen, *Angew. Chem. Int. Ed.*, 2018, **57**, 3158-3162.
5. A. S. Perera, T. M. Suduwella, N. H. Attanayake, R. K. Jha, W. L. Eubanks, I. A. Shkrob, C. Risko, A. P. Kaur and S. A. Odom, *Mater. Adv.*, 2022, DOI: 10.1039/D2MA00598K.
6. K. Gong, Q. Fang, S. Gu, S. F. Y. Li and Y. Yan, *Energy Environ. Sci.*, 2015, **8**, 3515-3530.
7. J. Barthel, R. Neueder and H. Roch, *J. Chem. Eng. Data*, 2000, **45**, 1007-1011.
8. N. H. Attanayake, J. A. Kowalski, K. V. Greco, M. D. Casselman, J. D. Milshtein, S. J. Chapman, S. R. Parkin, F. R. Brushett and S. A. Odom, *Chem. Mater.*, 2019, **31**, 4353-4363.
9. N. H. Attanayake, Z. Liang, Y. Wang, A. P. Kaur, S. R. Parkin, J. K. Mobley, R. H. Ewoldt, J. Landon and S. A. Odom, *Mater. Adv.*, 2021, **2**, 1390-1401.
